# Supplementary material for: Simple modification to allow high-efficiency and high-resolution multi-material 3D-printing fabrication of microfluidic devices
Source: Royal Society of Chemistry journal article supplement (doi:10.1039/d3lc00356f), 2023-01-01
Supplement: d3lc00356f1.pdf [file d3lc00356f1.pdf]

## **Supplementary Information**

### **Simple Modification to Allow High-Efficiency and High-Resolution Multi-Material 3D-Printing Fabrication of Microfluidic Devices**

Reverson Fernandes Quero<sup>1</sup>, Dosil Pereira de Jesus<sup>1,2</sup>, José Alberto Fracassi da  
Silva<sup>1,2,\*</sup>

<sup>1</sup>Institute of Chemistry, University of Campinas, UNICAMP, P.O. Box 6154, 13083-  
970 Campinas, SP, Brazil

<sup>2</sup>Instituto Nacional de Ciência e Tecnologia de Bioanalítica (INCTBio), Campinas,  
SP, Brazil

\*Corresponding author: fracassi@unicamp.br



## **Supplementary Information Index**

**Figure SI1** – Position of the DLP projector and details of its construction.

**Figure SI2** – Position of the two stepper motors on the printer and vat inclination system.

**Figure SI3** – Resin being sucked back to the source reservoir.

**Figure SI4** – Vat design and printed part.

**Figure SI5** – Print platform design with chamfered perimeter design for easy resin cleaning when changing materials.

**Figure SI6** – G-code generated for multi-material printing of the object using the NanoDLP software.

**Figure SI7** – Manual editing of G-code using Monkeyprint software as controller and links to download the files.

**Figure SI8** – Parts list for adaptation of Nova3D Bene6 printer 2021 version.

**Figure SI9** – Parts list for adaptation of Anycubic DLP D2 printer 2022 version.

**Table SI1** – Characteristics of the DLP projector (manufacturer information).

**Table SI2** - Additional data on the resins used.



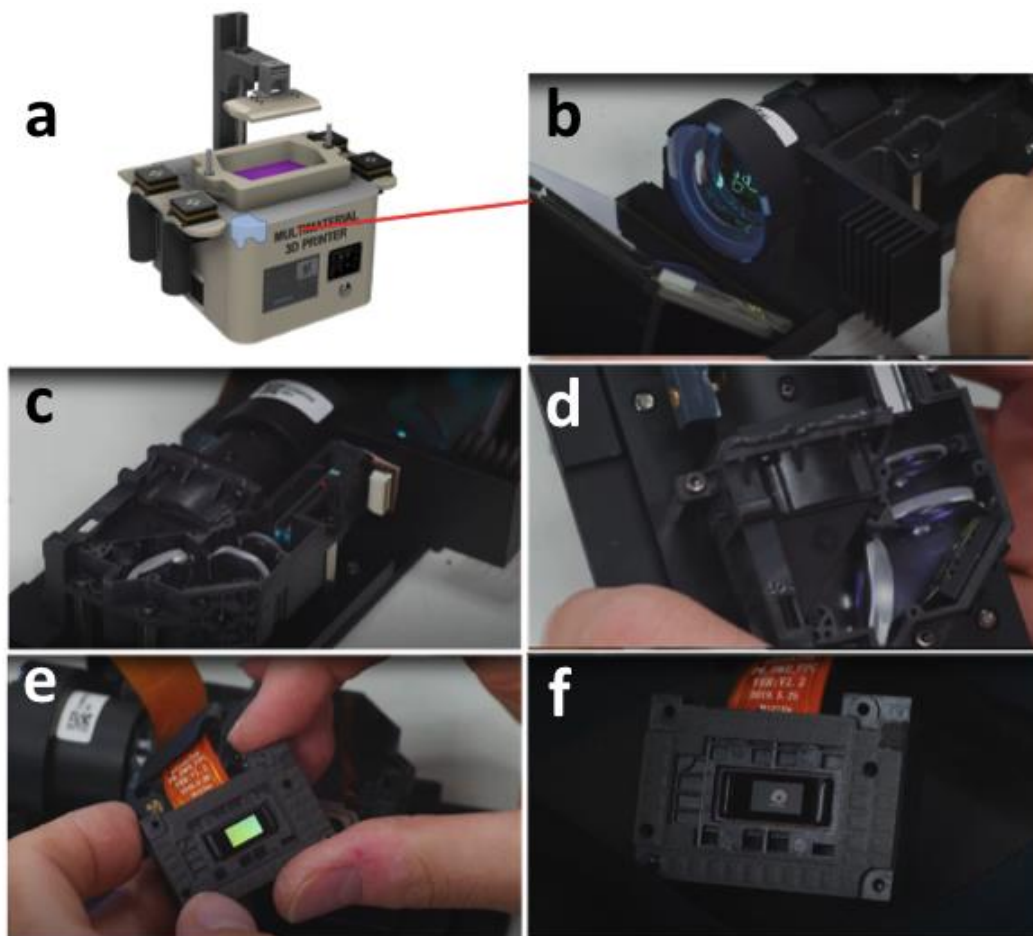

**Figure S11** - Position of the DLP projector\* and details of its construction. (a) Position on the printer case. (b) Projection lens and mirror. (c-d) Details of the internal optics. (e-f) Detail of the digital micromirror device (DMD). In (f) is projected the logotype of the State University of Campinas (UNICAMP).

\*PDC07 light engine inside DLP 660te UHD DMD chipset, which is well suited for professional industrial 3D printer, the kit projection optical system have been optimized from 385nm to 405nm wavelength especially; use all glass lens and metallic body material to meet the industrial device requirement; also, several type of projection lens optionally could match with the projection optical system to meet the different printing image; Developers can easily manage the light power, create, store, through an easy-to-use graphical user interface from development platform.

Features

- 1. High resolution 3840\*2160
- 2. Instant LED on/off.
- 3. Dedicated for UV Lithography application.
- 4. Excellent optical performance
- 5. Easy installation to multiple unit integration
- 6. Common software platform : PDC05/PDC06/PDC07

(Manufacturer information)



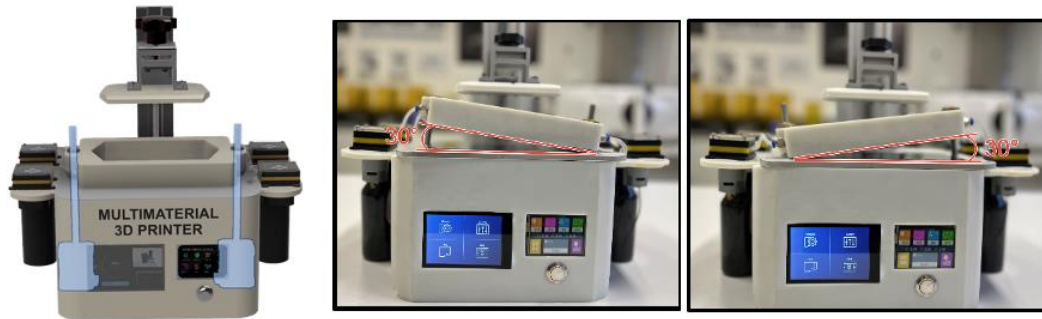

**Figure SI2** - Position of the two stepper motors and vat inclination system.

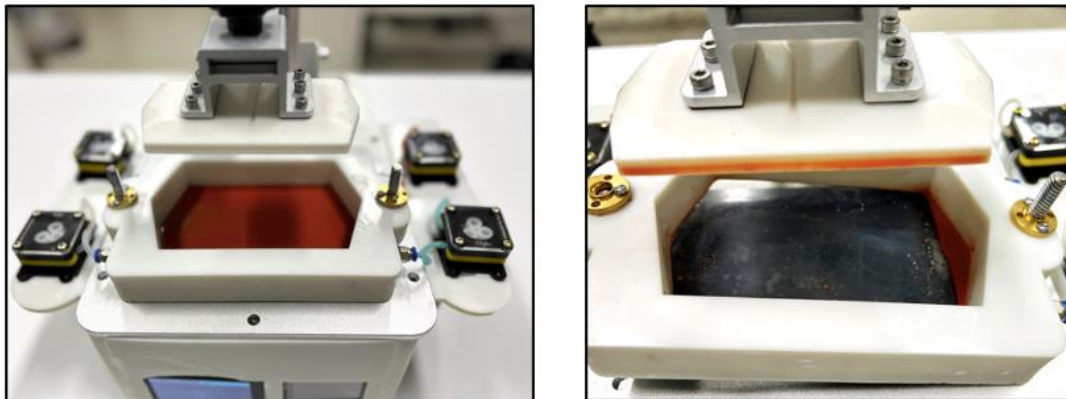

**Figure SI3** - Resin being withdraw back to the source reservoir.



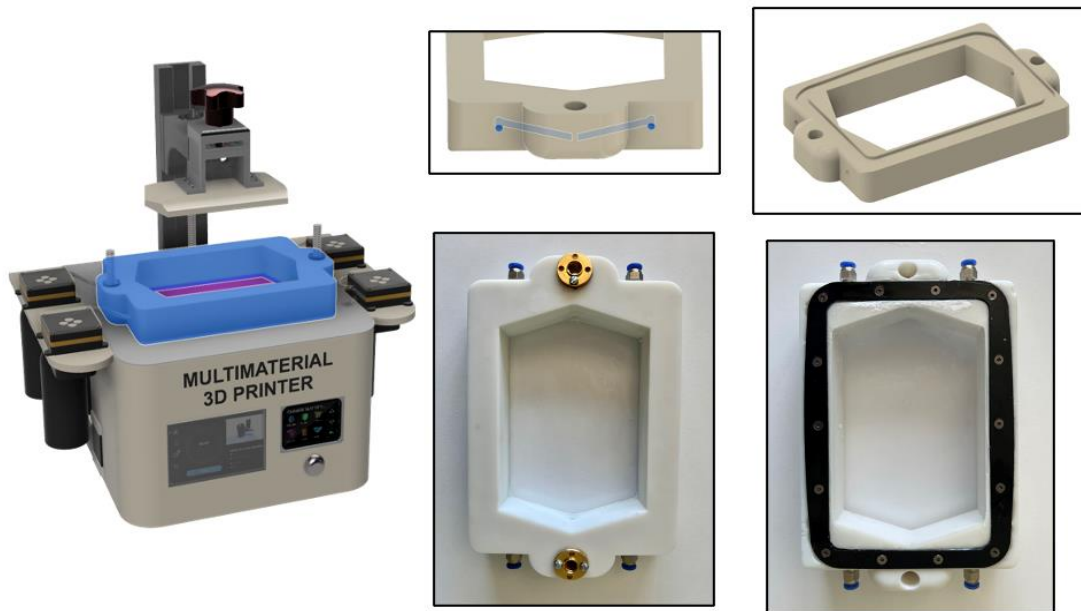

**Figure SI4** - Vat design and printed part.

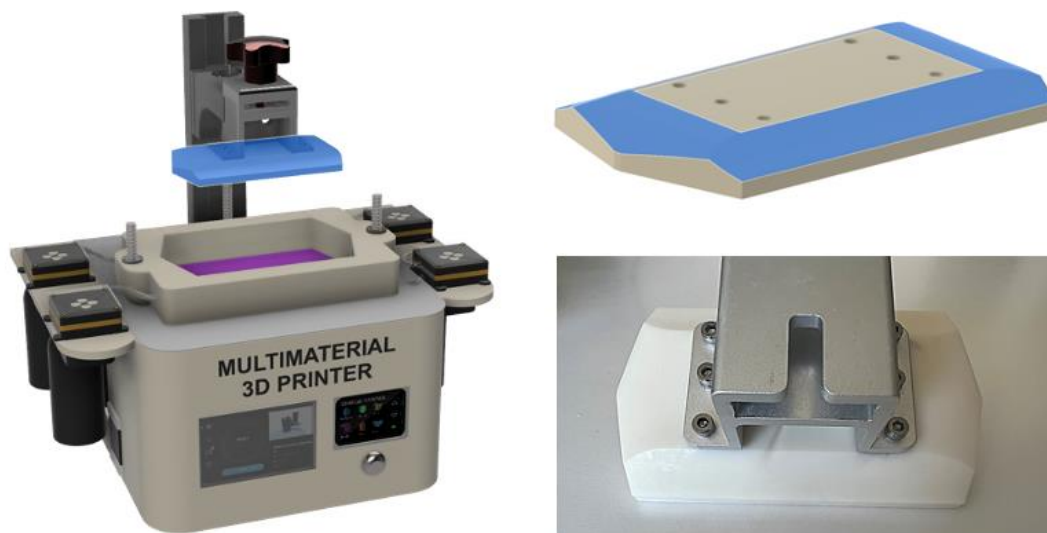

**Figure SI5** – Print platform design with chamfered perimeter design for easy resin cleaning when changing materials.



Anti-aliasing

Enable

Rotate Layers

Disabled

### GCode

Syscall Before Each Layer

Syscall After Each Layer

GOODE Before Each Layer

G4 P1  
G1 Z[[LayerPosition]]  
[[WaitForDoneMessage]]  
M114  
[[PositionSet [[LayerPosition]]]]

GOODE After Each Layer

[[PositionChange [[ZiftDistance]]]]

Indicate layers for material change

### Override Machine Level Settings

Override Start of Print GCode

Override Resume Print GCode

Override Print Stop GCode

Override XY Resolution

50,000000

XY Size Modifier

0,000000

Z Model Size Modifier

0,000000

Submit



**Figure SI6** – G-code generated for multi-material printing of the object using the NanoDLP software.

```
G-Code_UNICAMP_GEM03

**G-Code - Bootup:**

**G-Code - Start Of Print:**

$X ; Unlock GRBL in case we're in an alarm state
G90 ; Put GRBL in absolute mode
$H ; Home GRBL so we can start from a known place
G4 P0.1 ; SolidRay movement sync
[[WaitForDoneMessage]] ; Wait done message
G92 X0 Y0 Z0 ; Set our new homed position as the origin
[[PositionSet 0]] ; Set the current position as 0 in NanoDLP

**G-Code - Before Each Layer:**

G01 Z[[LayerPosition]] F100 ; Move to the correct layer height
G4 P0.1 ; SolidRay movement sync
[[WaitForDoneMessage]] ; Wait done message
[[PositionSet [[LayerPosition]]]] ; Save the current position in NanoDLP

**G-Code - After XX Layer:**

[[Delay 1]] ; Wait 1 second for the resin to "settle"
G01 Z[[[LayerPosition]] + [[ZLiftDistance]]] F100 ; Indicate the position that the platform must go up to change material
G4 P0.1 ; Here must be added the code for material exchange
[[WaitForDoneMessage]] ; Wait done message. You can put a message on the panel warning the change of material or a sound beep.
[[Delay 120]] ; Wait 120 seconds. Put the time for material exchange for the resin.
[[PositionChange [[ZLiftDistance]]]] ; Indicate the position that the platform must lower to change material.

**G-Code - End Of Print:**

$X ; Unlock GRBL just in case
G01 Z0 F100 ; Bring the platform above the resin level

**G-Code - Resume Print:**

$X ; Unlock GRBL in case we're in an alarm state
G90 ; Put positioning in absolute mode
G92 Z[[CurrentPosition]] Y0 X0 ; System crashed so we need to recover current position from NanoDLP and set it in GRBL
G1 Z[[LayerPosition]] F100; Move to layer position
G4 P0.1 ; SolidRay movement sync
[[WaitForDoneMessage]] ; Wait done message
```

**Figure SI7** - Manual editing of G-code using Monkeyprint software as controller.

Software, Firmware and files: [LINK DRIVE](#)

G-Codes on-line editor: [LINK GITHUB](#)



Simple Modification to Allow High-Efficiency and High-Resolution  
Multi-Material 3D-Printing Fabrication of Microfluidic Devices

Parts list for adaptation in Nova3D Bene6 Printer 2021 version

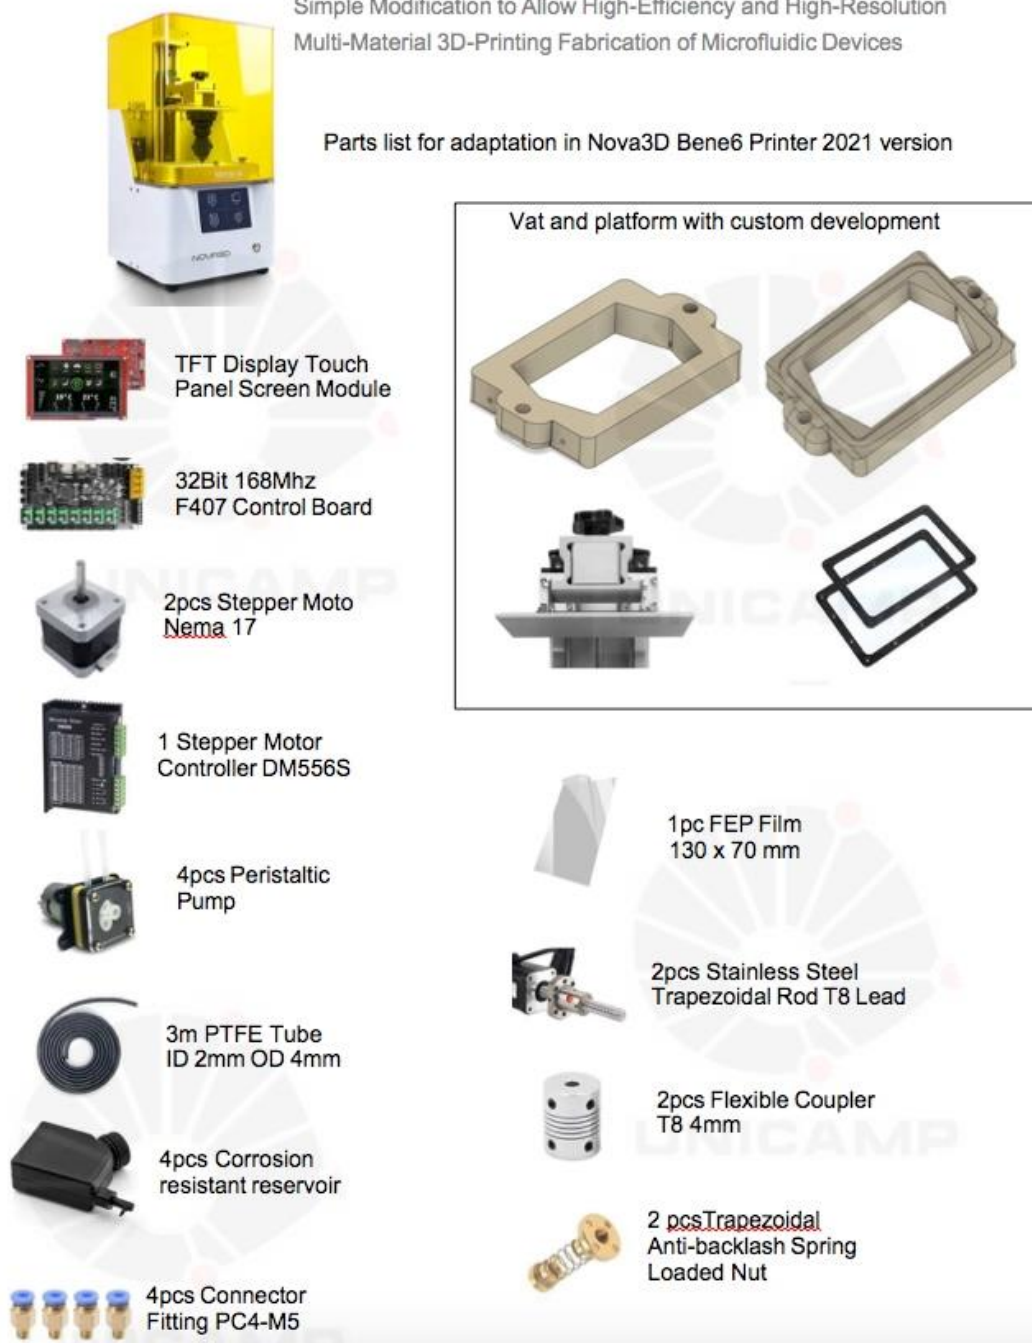

**Figure SI8** – Parts list for adaptation of Nova3D Bene6 printer 2021 version.



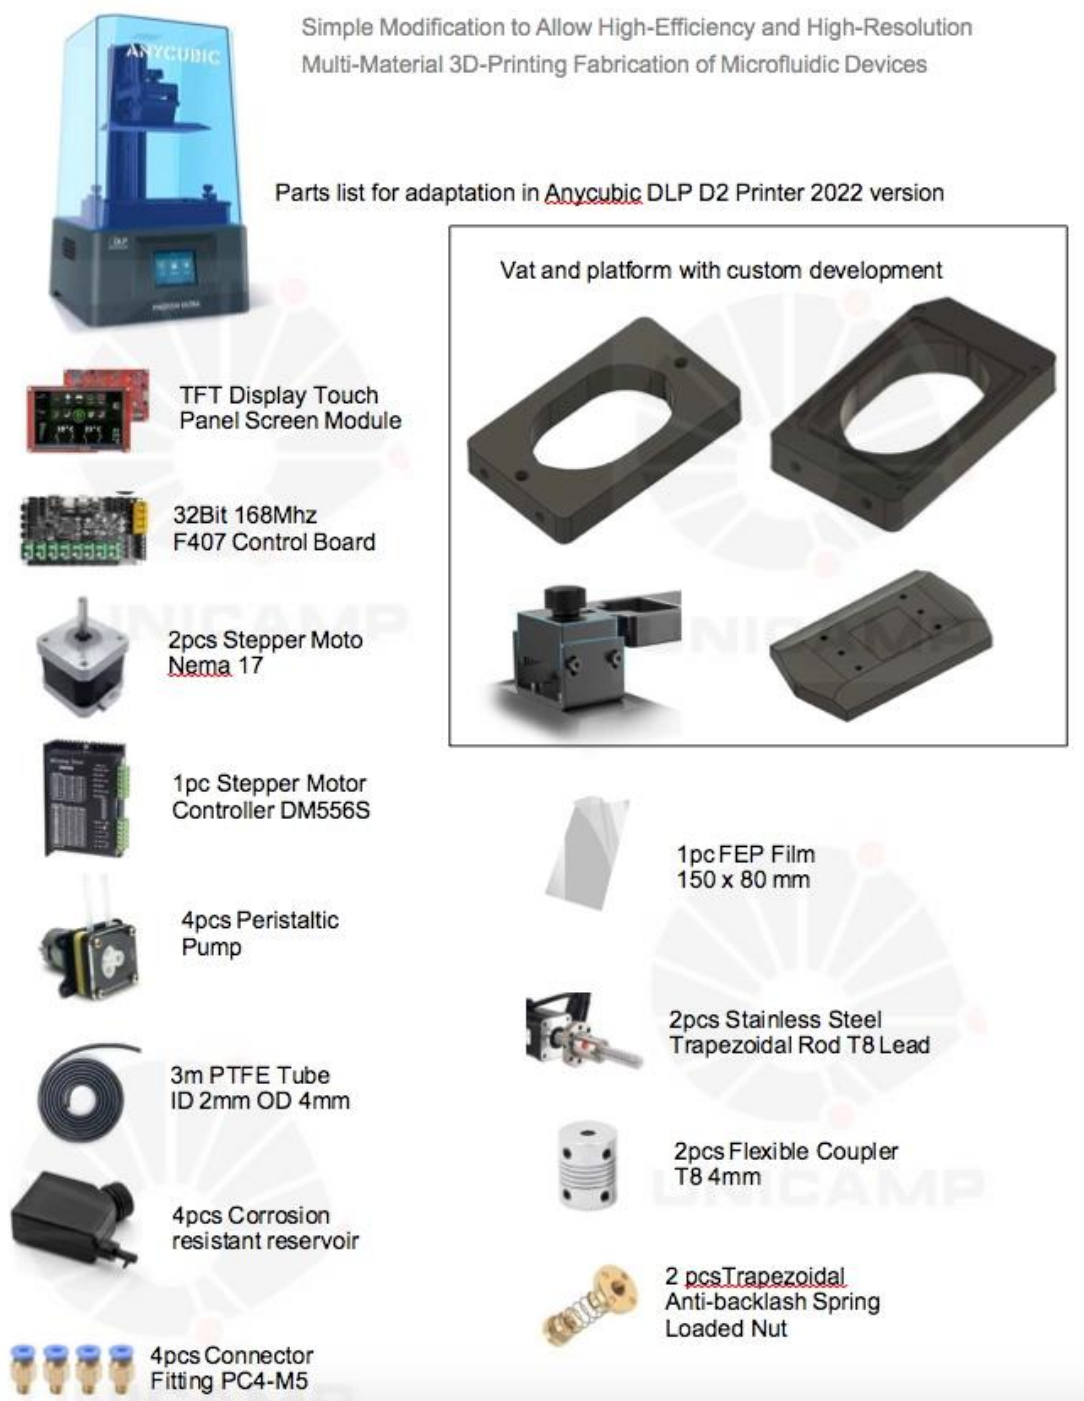

**Figure SI9** – Parts list for adaptation of Anycubic DLP D2 printer 2022 version.



**Table SI1** – Characteristics of the DLP projector (manufacturer information).

## Model

| NO | Production name | Printing Resolution | Image@Work distance | Optical distortion | wavelength |
|----|-----------------|---------------------|---------------------|--------------------|------------|
| 1  | PDC07-30        | 28-35um             | 115.2*64.8@158      | 0.10%              | 405/385    |

## Specifications

|                   |                                |
|-------------------|--------------------------------|
| Display technique | TI DLP 0.66-inch 4K UHD DMD    |
| Resolution        | 3840*2160 XPR                  |
| Light source      | LED UV405/385nm                |
| Light channel     | Single channel                 |
| Optical power     | 5.5W@120W                      |
| Offset            | Without offset                 |
| Contrast          | 1200:1                         |
| Uniformity        | >92%                           |
| Power supply      | AC110V~240V, 50/60HZ, DC12V/7A |
| Total power       | <120W                          |
| Dimension         | L325*W272*H160mm               |
| interface         | DCIN                           |
|                   | HDMI-TYPEA                     |
|                   | miniUSB                        |



Table SI2 - Additional data on the resins used

| Resin               | Composition/Modification                        | Feature/application | Viscosity (cps at 25 °C) | Tensile strength (MPa) |
|---------------------|-------------------------------------------------|---------------------|--------------------------|------------------------|
| GEM 1 <sup>a</sup>  | See note below                                  | Rigid-clear         | 176 ± 30                 | 38 ± 8                 |
| GEM C1 <sup>a</sup> | PEDOT:PSS                                       | Conductive          | 484 ± 30                 | 54 ± 7                 |
| GEM C2 <sup>a</sup> | 3D-ADD CuEK1                                    | Conductive          | 375 ± 40                 | 48 ± 12                |
| GEM 2 <sup>a</sup>  | GEM 1 with blue fluorescent pigment XUK473/3019 | Fluorescent         | 198 ± 20                 | 42 ± 8                 |
| GEM 3 <sup>a</sup>  | GEM 1 with fluorophore pigment TEXWUJJJ         | Phosphorescent      | 234 ± 30                 | 40 ± 10                |
| Siraya Fast         | Pigmented with dyes                             | Colored resins      | 100 <sup>b</sup>         | 33 <sup>b</sup>        |
| 3Dresyn IM-HT-WS    | Commercial - unmodified                         | Water-soluble       | <100 <sup>b</sup>        | >40 <sup>b</sup>       |
| Siraya Blu          | Commercial - unmodified                         | Rigid-clear         | 700 <sup>b</sup>         | 50 <sup>b</sup>        |
| Siraya Tenacious    | Commercial - unmodified                         | Flexible            | 500 <sup>b</sup>         | 24 <sup>b</sup>        |

<sup>a</sup> Manufactured resin: GEM 1: Oligomer: 39.8% Ebecryl 8210 and 39.8% Sartomer SR 494. Reactive diluente: 19.8%, genomer 1122. Photoinitiator: 0.4%, 2,4,6 Trimethylbenzoyl-diphenyl-phosphineoxide (TPO) and UV blocker, 0.2 %: 2,2'-(2,5-thiophenediyl)bis(5-tert-butylbenzoxazole) (OB+).

GEM C1: GEM 1 with poly(3,4-Ethylenedioxythiophene)-polystyrenesulfonate (PEDOT:PSS).

GEM C2: GEM 1 with 3D-ADD CuEK1.

<sup>b</sup> Provided by the manufacturer.
